# Is cerebrospinal fluid drainage of benefit to neuroprotection in patients undergoing surgery on the descending thoracic aorta or thoracoabdominal aorta?

Haris Bilal<sup>a</sup>, Bridie O'Neill<sup>b</sup>, Sarah Mahmood<sup>c</sup> and Paul Waterworth<sup>a,\*</sup>

<sup>a</sup> Department of Cardiothoracic Surgery, University Hospital of South Manchester, Manchester, UK

<sup>b</sup> School of Medicine, University of Manchester, Manchester, UK

<sup>c</sup> School of Medicine, University of Liverpool, Liverpool, UK

\* Corresponding author. Department of Cardiothoracic Surgery, University Hospital of South Manchester, Manchester M23 9LT, UK. Tel: +44-161-9987070; fax: +44-161-99687071; e-mail: paul.waterworth@uhsm.nhs.uk (P. Waterworth).

Received 27 February 2012; received in revised form 5 May 2012; accepted 16 May 2012

## Abstract

A best evidence topic in cardiac surgery was written according to a structured protocol. The question addressed was 'Is cerebrospinal fluid (CSF) drainage of benefit in patients undergoing surgery on the descending thoracic aorta or thoracoabdominal aorta?' Altogether 1177 papers were found using the reported search, of which 17 represented the best evidence to answer the clinical question. The authors, journal, date and country of publication, patient group studied, study type, relevant outcomes and results of these papers are tabulated. Ten of 13 studies demonstrate significant neurological protection from CSF drainage ( $\pm$ additional adjuncts), with two further papers showing no significant difference between patients who had or had not had CSF drainage and one study unable to provide any conclusions. For patients having surgery on the thoracic aorta or thoracoabdominal aorta CSF drainage, maintaining pressures  $<10$  mmHg ( $P < 0.03$ ), in conjunction with other neuroprotective strategies, minimizes the risk of neurological sequelae when compared with patients treated with similar adjuncts but without CSF drainage. The majority of studies used additional neuroprotective strategies, including cooling and reattachment of the intercostal arteries as adjuncts to CSF drainage. Logistic regression curves demonstrated that the longer the ischaemia time, the greater the benefit from CSF drainage ( $P < 0.04$ ). Four papers observed complications of CSF drainage, of which the main complications were: catheter occlusion or dislodgement, headache, meningitis and subdural haematoma. Overall, CSF drainage does offer a neuroprotective benefit; preventing paraplegia if CSF pressures are maintained  $<10$  mmHg.

**Keywords:** Cerebrospinal fluid • Thoracic aortic • Cardiac • Thoracoabdominal

## INTRODUCTION

A best evidence topic was constructed according to a structured protocol. This is fully described in the ICVTS [1].

## THREE-PART QUESTION

In [patients undergoing thoracic aortic or thoracoabdominal aortic surgery] is [cerebrospinal fluid drainage] of [benefit to neuroprotection]?

## CLINICAL SCENARIO

You have a 63-year old patient listed for repair of an extensive aneurysm to the descending thoracic and thoracoabdominal aorta. You wonder whether to use cerebrospinal fluid (CSF) drainage in this patient.

## SEARCH STRATEGY

An English language literature review was performed on MEDLINE 1948 to July 2011 using the Ovid interface: ['Cerebrospinal Fluid drainage'] AND ['Thoracic aortic' OR 'Thoracoabdominal aortic'].

## SEARCH OUTCOME

The search returned 1177 papers. From these, 21 papers were identified as answering our question. Duplicated and nonrandomized studies containing fewer than 40 patients who had undergone CSF drainage were removed. Seventeen papers provided the best evidence to answer the question: These are presented in Table 1.

## RESULTS

The studies examined the effects of CSF drainage (CSFDr) in descending thoracic aortic aneurysms (TAAs) or Type I, II or III thoracoabdominal aortic aneurysms (TAAAs).

Table 1: Best evidence papers

| Author (date), Journal and country<br>Study type<br>(level of evidence)                        | Patient group                                                                                                                                                                                                                                                                          | Outcomes                                                                                                            | Key results                                                                                                                                               | Comments, study weaknesses                                                                                                                                                                                                                                                                                                                             |
|------------------------------------------------------------------------------------------------|----------------------------------------------------------------------------------------------------------------------------------------------------------------------------------------------------------------------------------------------------------------------------------------|---------------------------------------------------------------------------------------------------------------------|-----------------------------------------------------------------------------------------------------------------------------------------------------------|--------------------------------------------------------------------------------------------------------------------------------------------------------------------------------------------------------------------------------------------------------------------------------------------------------------------------------------------------------|
| Cina et al. (2004),<br>J Vasc Surg, Canada [2]<br><br>Meta-analysis<br>(level 1a)              | Fourteen studies were identified that used CSF drainage (CSFDr) of patients undergoing elective or emergent surgery to treat dissecting and nondissecting TAAAs and TAAAs                                                                                                              | Paraplegia (randomized and non-randomized studies with a control group)                                             | OR 0.30 in patients undergoing CSFDr (95% CI 0.17–0.54, $P = 0.0001$ ). ARR = 9% (95% CI 5–13%, $P = 0.0001$ ). NNT = 11 (95% CI 8–20)                    | A number of small, poorer quality studies were included in the meta-analysis. Authors concluded that CSF drainage should be used in high-risk TAAA and dissection patients, although further research is required                                                                                                                                      |
|                                                                                                |                                                                                                                                                                                                                                                                                        | Paraplegia (randomized studies)                                                                                     | OR 0.35 in patients undergoing CSFDr (95% CI 0.12–0.99, $P = 0.05$ )                                                                                      |                                                                                                                                                                                                                                                                                                                                                        |
|                                                                                                |                                                                                                                                                                                                                                                                                        | Paraplegia (five cohort studies with control group)                                                                 | ARR 9% (95% CI 3–13%)                                                                                                                                     |                                                                                                                                                                                                                                                                                                                                                        |
|                                                                                                |                                                                                                                                                                                                                                                                                        | In-hospital mortality (randomized studies)<br>Lower limb neurological deficit (randomized studies)                  | No difference between CSFDr and control ( $P = 0.56$ )<br>12% in CSFDr, vs 33% in control. NNT = 9 (95% CI 5–50)                                          |                                                                                                                                                                                                                                                                                                                                                        |
| Khan and Stansby (2008), Cochrane Database Syst Rev, UK [3]<br><br>Meta-analysis<br>(level 1a) | Three RCTs ( $n = 289$ ) examining the neurological sequelae $\pm$ CSFDr were included in the analysis                                                                                                                                                                                 | CSFDr complications                                                                                                 | 3 of 1486: 2 subdural haematoma requiring surgical decompression, 1 fatal meningitis                                                                      | Authors performed meta-analysis on just three RCTs (some of which used adjuncts to CSFDr). Authors concluded that more research is required                                                                                                                                                                                                            |
|                                                                                                |                                                                                                                                                                                                                                                                                        | Neurological deficit (for patients undergoing CSFDr)                                                                | OR 0.57 (95% CI 0.28–0.17)                                                                                                                                |                                                                                                                                                                                                                                                                                                                                                        |
| Crawford et al. (1991),<br>J Vasc Surg, USA [4]<br><br>Prospective RCT<br>(level 1b)           | Ninety-eight patients due to undergo repair of Type I and II TAA randomized to CSFDr ( $n = 46$ ) and control ( $n = 520$ )                                                                                                                                                            | Number of patients with neurological deficit in patients who became hypotensive ( $<100$ mmHg systolic)             | CSFDr, 2 of 16;<br>Control, 6 of 15 ( $P = 0.08$ )                                                                                                        | Authors concluded that there was no benefit in CSFDr but they did not control CSF pressures evenly                                                                                                                                                                                                                                                     |
|                                                                                                |                                                                                                                                                                                                                                                                                        | Neurological scores of patients with immediate neurological deficits<br><br>(CSFDr $n = 10$ ,<br>Control $n = 11$ ) | No significant difference at discharge/death ( $P = 1.0$ ), cumulative follow-up/death ( $P = 0.8$ ) or survivor score at 86 days–17 months ( $P = 0.9$ ) |                                                                                                                                                                                                                                                                                                                                                        |
|                                                                                                |                                                                                                                                                                                                                                                                                        | Number of patients with delayed neurological deficits                                                               | CSFDr, 3 of 3;<br>control, 6 of 41<br>( $P = 0.6$ )                                                                                                       |                                                                                                                                                                                                                                                                                                                                                        |
| Svensson et al. (1998),<br>Ann Thorac Surg, USA [5]<br><br>Prospective RCT<br>(level 1b)       | Thirty-three Type I and II TAAA patients were randomized to CSFDr + IP ( $n = 17$ ) or control ( $n = 16$ )<br><br>CSFDr patients were administered treated with IP and drainage was commenced prior to surgery and for 2–60 h postoperatively. CSF pressure maintained $\leq 10$ mmHg | Neurological injury                                                                                                 | CSFDr + IP, 2 of 17;<br>control, 7 of 16<br>( $P = 0.0392$ , Pearson's $\chi^2$ )                                                                         | This study had a small population size. This was due to interim analysis stopping the study following just a third of total patient recruitment due to the significant increase in paraplegia in the control group CSFDr was in conjunction with administration of IP. Other neurological protection techniques in both groups included active cooling |
|                                                                                                |                                                                                                                                                                                                                                                                                        | Lowest mean motor score                                                                                             | CSFDr + IP, 3.88; control, 3.25<br>( $P = 0.034$ t-test, $P = 0.17$ Kruskal–Wallis)                                                                       |                                                                                                                                                                                                                                                                                                                                                        |
|                                                                                                |                                                                                                                                                                                                                                                                                        | Neurological injury risk                                                                                            | OR for CSFDr + IP = 0.02 (95% CI 0.00–0.68, $P = 0.039$ )<br>Adjusted for active cooling                                                                  |                                                                                                                                                                                                                                                                                                                                                        |

Continued

Table 1: Continued

| Author (date), Journal and country<br>Study type<br>(level of evidence)                                                   | Patient group                                                                                                                                                                                                                                                                            | Outcomes                                                                                                                   | Key results                                                                                                                                                                                                                                                                       | Comments, study weaknesses                                                                                                                                                                                                                                                                                                                                                                                                                                                                                                                                                   |
|---------------------------------------------------------------------------------------------------------------------------|------------------------------------------------------------------------------------------------------------------------------------------------------------------------------------------------------------------------------------------------------------------------------------------|----------------------------------------------------------------------------------------------------------------------------|-----------------------------------------------------------------------------------------------------------------------------------------------------------------------------------------------------------------------------------------------------------------------------------|------------------------------------------------------------------------------------------------------------------------------------------------------------------------------------------------------------------------------------------------------------------------------------------------------------------------------------------------------------------------------------------------------------------------------------------------------------------------------------------------------------------------------------------------------------------------------|
|                                                                                                                           |                                                                                                                                                                                                                                                                                          |                                                                                                                            | ( $P = 0.037$ ) and aortic clamp time ( $P = 0.029$ )                                                                                                                                                                                                                             | (29–31°C), sequential cross clamping of aortic segments and preservation where possible of intercostals and lumbar arteries                                                                                                                                                                                                                                                                                                                                                                                                                                                  |
| Coselli <i>et al.</i> (2002), J Vasc Surg USA [6]<br>Prospective RCT<br>(level 1b)                                        | One hundred and fifty-six patients undergoing Type I or II TAAA repairs were randomized to CSFDr ( $n = 82$ ) or control ( $n = 74$ )<br>CSFDr was initiated intraoperatively and continued for 2 days postoperatively, with CSF pressure maintained $\leq 10$ mmHg                      | Mortality rate<br>In hospital:<br>30 day<br>Paraplegia or paraparesis                                                      | CSFDr, 6 of 82, control, 5 of 74 ( $P = 1.0$ )<br>CSFDr, 4 of 82, control, 2 of 74 ( $P = 0.68$ )<br>CSFDr, 2 of 82, control, 9 of 74 ( $P = 0.03$ )<br>Logistic regression curves demonstrated increasing benefit from CSF drainage the longer the ischaemia time ( $P < 0.04$ ) | The study demonstrated an 80% reduction in relative risk in patients with CSFDr<br><br>The operative mortality for patients with neurological deficit was significantly higher at 45% than those without at 4.5% ( $P = 0.0003$ )<br><br>Additional neuroprotection was afforded in both groups by left heart bypass, moderate heparinization, permissive hypothermia (32–33°C) and reattachment of the intercostals                                                                                                                                                         |
| Hollier <i>et al.</i> (1992), J Vasc Surg, USA [7]<br>Retrospective cohort with control<br>(level 2b)                     | One hundred and fifty patients undergoing thoracoabdominal replacement between June 1980 and June 1991<br>In 1989, a protocol of CSFDr was introduced. Patients were compared preprotocol ( $n = 101$ ) and postprotocol with CSFDr ( $n = 42$ ). CSF pressure maintained $\leq 10$ mmHg | Incidence of neurological deficit                                                                                          | Lower incidence ( $P < 0.01$ ) in CSFDr (0 of 42) compared with preprotocol control (6 of 101, 3 patients had no CSF drainage, 3 had no intercostal arteries reimplanted)                                                                                                         | Although CSF drainage became protocol in 1989, some preprotocol patients still had CSF drainage on an individual basis, the extent of CSF drainage and use of other neuroprotective mechanisms preprotocol are not clear. The protocol after 1989 for neuroprotection also included: tight glucose control (insulin started if glucose $> 220$ mg/dl), an increase in systolic blood pressure to 15–20% above baseline during aortic occlusion, passive cooling to 32–34°C, thiopental sodium, mannitol, nimodipine and steroids and reimplantation of intercostals arteries |
| Murray <i>et al.</i> (1993), J Cardiothorac Vasc Anesth, USA [8]<br>Retrospective cohort study with control<br>(level 2b) | CSF drainage (maintained $< 15$ mmHg) for thoracic aortic aneurysm and Type I, II and III TAAA surgery was introduced as protocol in 1986. Preprotocol control patients ( $n = 49$ ) were compared with protocol patients receiving CSFDr ( $n = 50$ )                                   | Spinal deficit                                                                                                             | Comparable between control (4 of 45) and CSFDr (4 of 47)                                                                                                                                                                                                                          | Control patients were more aggressively cooled than the CSFDr patients<br><br>There was more thoracic (descending and Type I) aneurysms in the control compared with CSFDr ( $P < 0.05$ ). Six of 49 patients in the CSFDr group did not achieve CSF pressures $< 15$ mmHg. Additional protective strategies included the use of shunts and mild hypothermia (34°C)                                                                                                                                                                                                          |
| Safi <i>et al.</i> (1998), Ann Thorac Surg, USA [9]<br>Retrospective cohort study with control<br>(level 2b)              | Two hundred and seventy-one patients with TAAA or descending TAA undergoing cross-clamp times $> 30$ min, with CSF drainage (pressures $< 10$ mmHg) and distal aortic perfusion (CSF + DAP, $n = 159$ ) or without adjunct ( $n = 112$ )                                                 | Neurological deficit (in patients undergoing CSFDr + DAP)<br>cross-clamp $> 30$ min<br>cross-clamp $> 60$ min ( $n = 87$ ) | OR 0.28 (95% CI 0.11–0.70, $P = 0.004$ ) if OR = 0.20 ( $P = 0.009$ )                                                                                                                                                                                                             | Study used CSFDr in conjunction with distal aortic perfusion. Temperature drifts to $\sim 33^\circ\text{C}$                                                                                                                                                                                                                                                                                                                                                                                                                                                                  |

Continued

**Table 1:** Continued

| Author (date), Journal and country<br>Study type<br>(level of evidence)                                    | Patient group                                                                                                                                                                                                                                                                                                              | Outcomes                                              | Key results                                                                                                                                                                                                                                                                                                                                                                                                                                                                                                                                                                                                                                                                                                                               | Comments, study weaknesses                                                                                                                                                                                                                                                                |
|------------------------------------------------------------------------------------------------------------|----------------------------------------------------------------------------------------------------------------------------------------------------------------------------------------------------------------------------------------------------------------------------------------------------------------------------|-------------------------------------------------------|-------------------------------------------------------------------------------------------------------------------------------------------------------------------------------------------------------------------------------------------------------------------------------------------------------------------------------------------------------------------------------------------------------------------------------------------------------------------------------------------------------------------------------------------------------------------------------------------------------------------------------------------------------------------------------------------------------------------------------------------|-------------------------------------------------------------------------------------------------------------------------------------------------------------------------------------------------------------------------------------------------------------------------------------------|
| Safi et al. (2003), Ann Surg, USA [10]<br><br>Retrospective cohort study with control (level 2b)           | Thousand and four patients undergoing descending thoracic or thoracoabdominal aortic graft replacement over a 12-year period receiving either an adjunct of CSF drainage + DAP (n = 741) or without (n = 263)                                                                                                              | Early neurological deficit<br><br>Long-term mortality | Univariate analysis. OR of 0.33 (95% CI 0.17–0.66, P = 0.0009) in CSFDr + DAP patients<br><br>CSFDr + DAP prevented 1 of 20 cases of neurological deficit in all patients, at 1 of 5 in the high-risk TAAA Type II patients<br><br>Number needed to treat to prevent paraplegia was 23 (all patients) and 5 (Type II TAAA)<br><br><i>Multiple Cox regression</i><br>adjusted hazard ratio for CSFDr + DAP = 0.80 (P = 0.053, 95% CI 0.64–1.00)<br><br><i>Univariate/Multivariate analysis</i><br>Increased survival in Type II patients undergoing CSFDr + DAP (univariate P < 0.0001, multivariate P < 0.002)<br><br>Increased survival in none Type II patients undergoing CSFDr + DAP (univariate P = 0.0001, multivariate P = 0.0001) | Study used CSFDr in conjunction with DAP. CSF pressure <10 mmHg. Core temperature is maintained between 32 and 33°C and, kidney temperature <20°C                                                                                                                                         |
| Estrera et al. (2005), Ann Thorac Surg, USA [11]<br><br>Retrospective cohort study with control (level 2b) | Three hundred and fifty-five patients undergoing descending TAA repair (55 excluded from analysis due to the use of DHCA or aortic rupture)<br><br>Patients either received neuroprotection from CSF drainage for 3 days + DAP (pressures <10 mmHg, n = 238) or no protection (n = 62)                                     | Neurological deficit                                  | Lower incidence of deficit in CSFDr + DAP (2 of 238) compared with control (4 of 62) (P < 0.02)<br><br>Univariate analysis: OR = 0.19 (P < 0.02) in CSFDr + DAP patients                                                                                                                                                                                                                                                                                                                                                                                                                                                                                                                                                                  | Study used CSFDr in conjunction with DAP. Reimplantation of the intercostals arteries was performed where possible                                                                                                                                                                        |
| Acher et al. (1998), J Vasc Surg, USA [12]<br><br>Prospective cohort study with control (level 2b)         | Two hundred and seventeen patients who underwent thoracoabdominal (n = 176) and descending thoracic (n = 41) aneurysm surgery and, consequently multivariate and univariate analyses of perioperative variables. CSF drainage was performed in conjunction with naloxone administration in 147 patients, and without in 58 | Paraplegia or paraparesis                             | Five of 147 CSFDr + naloxone (expected = 31) and 12 of 58 (expected = 13) in none CSF drainage<br><br>Univariate analysis: OR 0.025 (P < 0.03) for patients undergoing CSFDr + naloxone                                                                                                                                                                                                                                                                                                                                                                                                                                                                                                                                                   | Reduced paraplegia incidence with the use of CSF drainage. Study used CSFDr in conjunction with naloxone. No intercostal reimplantation was performed                                                                                                                                     |
| Cheung et al. (2002), Ann Thorac Surg, USA [13]<br><br>Prospective observational cohort study (level 2b)   | Ninety-nine patients who underwent surgical repair of Type I, II or III TAAA or TAA repair with CSF drainage (pressures <12 mmHg)                                                                                                                                                                                          | Paraplegia or paraparesis                             | Eleven of 99 patients (8 cases were delayed onset). Lumbar CSF pressure at diagnosis was higher (14 ± 3 (SD)) than at the time of recovery (10 ± 3 mmHg) (P < 0.001)                                                                                                                                                                                                                                                                                                                                                                                                                                                                                                                                                                      | Patients did not consistently undergo CSF drainage at the same time and it is unclear how many did undergo perioperative CSF drainage. Hypothermic circulatory arrest, 'total body' retrograde cerebral perfusion and intercostal artery re-attachment were also used for neuroprotection |
| Hnath et al. (2008), J Vasc Surg, USA [14]                                                                 | One hundred and twenty-one patients undergoing TEVAR with                                                                                                                                                                                                                                                                  | Spinal cord ischaemia                                 | One of 56 patients in the CSFDr group due to a faulty CSF drain (full recovery)                                                                                                                                                                                                                                                                                                                                                                                                                                                                                                                                                                                                                                                           | Fewer incidences of spinal cord ischaemia with CSF drainage. Patients in CSFDr and control                                                                                                                                                                                                |

Continued

Table 1: Continued

| Author (date), Journal and country<br>Study type<br>(level of evidence)                            | Patient group                                                                                                                                                                                                      | Outcomes                                                                                                                              | Key results                                                                                                                                                                                                                                                                                                                                                                                                                                                                  | Comments, study weaknesses                                                                                                                                                                                                                                 |
|----------------------------------------------------------------------------------------------------|--------------------------------------------------------------------------------------------------------------------------------------------------------------------------------------------------------------------|---------------------------------------------------------------------------------------------------------------------------------------|------------------------------------------------------------------------------------------------------------------------------------------------------------------------------------------------------------------------------------------------------------------------------------------------------------------------------------------------------------------------------------------------------------------------------------------------------------------------------|------------------------------------------------------------------------------------------------------------------------------------------------------------------------------------------------------------------------------------------------------------|
| Observational cohort study<br>(level 2b)                                                           | (n = 56) or without (n = 65) CSF drainage                                                                                                                                                                          |                                                                                                                                       | following insertion of new drain). Four of 65 patients in the control group (following CSF drain insertion 2 had a full recovery, 1 patient a partial recovery and 1 patients did not recover)                                                                                                                                                                                                                                                                               | groups had differing numbers previous AAA and subclavian artery coverage ( $P < 0.05$ ). No additional neuroprotection was noted to be used                                                                                                                |
| Weaver <i>et al.</i> (2001), J Vasc Surg, USA [15]<br>Observational cohort study<br>(level 2b)     | Sixty-five patients undergoing TAAA repair, of which 62 had CSF drainage for a mean of 2.4 days (range = 1–6 days)                                                                                                 | Complications of CSF drainage                                                                                                         | Two cases (of 62 patients) of intradural haematoma at site                                                                                                                                                                                                                                                                                                                                                                                                                   | Small observational group for complications. Intercostal artery reattachment was attempted in some patients                                                                                                                                                |
| Cheung <i>et al.</i> (2003), Ann Thorac Surg, USA [16]<br>Observational cohort study<br>(level 2b) | Four hundred and thirty-two patients undergoing TAA or TAAA repair over a 9-year period, of which 162 used lumbar CSF drainage (pressures >12 mmHg intraoperatively and 10–12 mmHg for up to 24 h postoperatively) | Complications of CSF drainage                                                                                                         | <p>Occurred in 6 (of 162 patients): 1 temporary abducens nerve palsy, 1 meningitis after drain removal, 1 meningitis associated with a retained lumbar CSF catheter fragment, 2 additional patients had retained catheter fragments due to fracture of the catheter during removal, and 1 patient had a post-lumbar puncture spinal headache. All patients recovered with no sequelae</p> <p>No haemorrhagic complications, no epidural haematomas, no spinal haematomas</p> | Mean $\pm$ SD time between catheter insertion and heparin administration was $153 \pm 60$ . Hypothermia used if there was distal arch aneurysm. Intercostal arteries were reimplanted, distal perfusion and mild hypothermia or deep hypothermia were used |
|                                                                                                    |                                                                                                                                                                                                                    | Immediate postoperative paraplegia                                                                                                    | Four of 162 patients. No recovery in any                                                                                                                                                                                                                                                                                                                                                                                                                                     |                                                                                                                                                                                                                                                            |
|                                                                                                    |                                                                                                                                                                                                                    | Delayed onset paraplegia                                                                                                              | Fifteen of 162 patients. Eleven of 15 of these patients recovered with further CSF drainage                                                                                                                                                                                                                                                                                                                                                                                  |                                                                                                                                                                                                                                                            |
|                                                                                                    |                                                                                                                                                                                                                    | Mortality                                                                                                                             | 23 of 162                                                                                                                                                                                                                                                                                                                                                                                                                                                                    |                                                                                                                                                                                                                                                            |
| Wynn <i>et al.</i> (2009), J Vasc Surg, USA [17]<br>Observational cohort study<br>(level 2b)       | Four hundred and eighty-six patients undergoing TAA and TAAA repair with cerebrospinal fluid drainage (<10 mmHg) continued for 24–48 h postoperatively over an 11-year period                                      | <p>Drain failure<br/>Small drain vs large drain</p> <p>Post dural headache<br/>Small drain vs large drain</p> <p>Spinal infection</p> | <p>7.8%, 24 of 308 vs 1.7%, 3 of 174 (<math>P = 0.0054</math>)</p> <p>2 of 308 vs 4 of 174. All treated with epidural blood patch</p> <p>Nil</p>                                                                                                                                                                                                                                                                                                                             | Risk of complications of CSF drainage may be higher in patients with unrecognized chronic subdural haematoma or cerebral atrophy. It is not clear which neurological protective adjuncts were used                                                         |
|                                                                                                    | Three hundred and eleven patients had a small drain and 174 had a large                                                                                                                                            | Bloody CSF                                                                                                                            | Twenty-four of 482 patients. All had CT which showed: no haematoma formation in any patient but intracranial bleeding in 17 of 24 patients (3 of 17 of which had neurological deficit but were noted to have had preoperative cerebral atrophy with brain volume loss.)                                                                                                                                                                                                      |                                                                                                                                                                                                                                                            |
|                                                                                                    |                                                                                                                                                                                                                    |                                                                                                                                       | Higher volume of CSF drained correlated with an increased                                                                                                                                                                                                                                                                                                                                                                                                                    |                                                                                                                                                                                                                                                            |

Continued

Table 1: Continued

| Author (date), Journal and country<br>Study type<br>(level of evidence)                                          | Patient group                                                                                        | Outcomes                               | Key results                                                                                                                            | Comments, study weaknesses                                                                                                                                                                                                                                                                                                                                        |
|------------------------------------------------------------------------------------------------------------------|------------------------------------------------------------------------------------------------------|----------------------------------------|----------------------------------------------------------------------------------------------------------------------------------------|-------------------------------------------------------------------------------------------------------------------------------------------------------------------------------------------------------------------------------------------------------------------------------------------------------------------------------------------------------------------|
|                                                                                                                  |                                                                                                      |                                        | risk of bloody CSF (mean 178 vs 124 ml, $P < 0.0001$ ) and higher CVP preaortic occlusion (mean 16 vs 13 mmHg, $P = 0.0012$ )          |                                                                                                                                                                                                                                                                                                                                                                   |
|                                                                                                                  |                                                                                                      | Neurological deficits                  | Three of 17 bloody CSFs (although they all also had pre-existing cerebral atrophy, 1 of 3 died)                                        |                                                                                                                                                                                                                                                                                                                                                                   |
|                                                                                                                  |                                                                                                      |                                        | Two patients developed deficits on Day 5, due to cerebral subdural haematomas following anticoagulation (2 of 2 died)                  |                                                                                                                                                                                                                                                                                                                                                                   |
| Leyvi <i>et al.</i> (2005), J Cardiothorac Vasc Anesth, USA [18]<br><br>Retrospective cohort study<br>(level 2b) | Ninety-one patients who underwent TAAA repair with CSF drainage ( $n = 54$ ) or without ( $n = 37$ ) | Neurological events (CSFDr vs control) | Stroke (5.5 vs 5.4%)<br><br>Cerebral haemorrhage (5.5 vs 0%)<br><br>Paraplegia (5.5 vs 0%)<br>Seizures (1.8 vs 0%)<br>Death (11 vs 0%) | Hypothesized that too fast a removal of too large a volume of CSF may result in subdural haematoma due to tearing of the vessels. Additional neurological protection was afforded in both groups by one or more of permissive hypothermia (32°C), left atrial-femoral artery bypass, femoral-femoral bypass, atrial-distal bypass, permissive hypothermia or DCHA |

ARR: absolute risk reduction; CSF: cerebrospinal fluid; CVP: central venous pressure; ECC: extracorporeal circulation; LHB: left heart bypass; CPB: cardiopulmonary bypass; DAP: distal aortic perfusion; DHCA: deep hypothermic circulatory arrest; CSFDr: cerebrospinal fluid drainage; IP: intrathecal papaverine; OR: odds ratio; NNT: number needed to treat; TAA: thoracic aortic aneurysm; TAAA: thoracoabdominal aortic aneurysm; TEVAR: thoracic endovascular aortic repair; DAP: distal aortic perfusion; MAP: mean arterial pressure.

The two meta-analyses included the three randomized control trials (RCTs) (described below) looking at CSFDr in Type I and II TAAAs.

Cina *et al.*'s [2] meta-analysis, of 14 studies (including results from both TAAAs and TAAAs), found a pooled odds ratio (OR) from all studies of 0.3 for postoperative paraplegia in patients undergoing CSF drainage (95% confidence interval [CI] 0.17–0.54,  $P = 0.0001$ ).

Khan and Stansby's [3] meta-analysis, of the three RCTs only (all Type I or II TAAAs), reported a higher OR for postoperative paraplegia of 0.57 (95% CI 0.28–0.17) in patients undergoing CSF drainage.

Crawford *et al.* [4] conducted a RCT (98 patients) looking at CSF drainage (various CSF pressures) in Type I and II TAAA, and concluded that CSF drainage did not prevent paraplegia.

Svensson *et al.* [5] conducted a RCT (33 patients) assessing the effects of CSFDr and intrathecal papaverine (IP) (CSFDr + IP, pressures maintained <10 mmHg) compared with a control group in preventing neurological injury. Neurological injury occurred in 2 of 17 CSFDr + IP patients and 7 of 16 patients in the control ( $P = 0.0392$ ). Active cooling in combination with CSFDr + IP was used in 8 patients, none of whom experienced neurological

injury. The OR for neurological injury was 0.02, using CSFDr + IP (adjusted for active cooling and aortic clamp time).

Coselli *et al.* [6] found that CSF drainage (pressures maintained <10 mmHg) during the intraoperative and 48 h postoperative period reduced the rate of paraplegia after repair of Type I and II TAAAs ( $P = 0.03$ ). Logistic regression curves demonstrated that the longer the ischaemia time, the greater the benefit from CSF drainage ( $P < 0.04$ ).

Hollier *et al.* [7] found a lower incidence of neurological deficit ( $P < 0.01$ ) once CSF drainage was introduced as a routine protocol.

Murray *et al.* [8] conducted a retrospective cohort study of 99 patients undergoing descending thoracic aorta or TAAA (I, II, III) ± CSFDr. They found no significant difference in spinal deficit between the two groups.

Safi *et al.* [9] demonstrated a reduced risk of neurological deficit in patients with TAAA or descending TAA undergoing cross-clamp times >30 min (OR: 0.28, 95% CI 0.11–0.70,  $P = 0.004$ ) if CSFDr is used with distal aortic perfusion (CSFDr + DAP). A further study from Safi *et al.* [10] demonstrated that CSFDr + DAP conferred the greatest benefit in high-risk Type II TAAA patients in preventing neurological deficits (NNT all cases = 23, NNT Type II TAAA = 5). Improved long-term survival was

seen in CSFDr + DAP patients ( $P < 0.002$ ). Estrera *et al.* [11] found a lower incidence of neurological deficit in CSFDr + DAP patients (2 of 238) compared with controls (4 of 62) undergoing descending TAA repairs ( $P < 0.02$ ).

Acher *et al.* [12] found that CSF drainage (plus naloxone) was a significant factor in reducing paraplegia and paralysis post-TAAA or descending TAA surgery ( $P < 0.03$ ).

Cheung *et al.* [13] observed an incidence of 11 with paraplegia in 99 patients who underwent CSF drainage (pressure aim  $< 12$  mmHg) during TAAA and TAA repairs. Higher lumbar CSF pressures were demonstrated in patients with paraplegia compared with pressures when patients had recovered ( $P < 0.001$ ).

Hnath *et al.* [14] observed an increased incidence of spinal cord ischaemia following thoracic endovascular aortic repair without ( $n = 65$ ), compared with, ( $n = 56$ ) CSF drainage.

Weaver *et al.* [15] conducted an observational study ( $n = 65$ ) of complications following CSF drainage during TAAA repairs. Two of 62 patients undergoing CSF drainage developed intradural haematomas at the site of CSF catheter insertion.

Cheung *et al.* [16] found that 23 of 162 patients died (14.1% mortality). Nineteen patients developed immediate or delayed paraplegia or paraparesis, which was permanent in 8 patients. They also observed temporary abducens nerve palsy, meningitis, retained catheter fragments due to catheter fracture during removal and post-lumbar puncture spinal headache. All patients recovered with no sequelae.

Wynn *et al.* [17] demonstrated mortality from CSF drainage of 0.6%. The most common side effect was drain failure, the rate of which declined when using a larger drain ( $P = 0.0054$ ).

Leyvi *et al.* [18] reported higher incidences of neurological events in the CSFDr groups compared with controls.

## CLINICAL BOTTOM LINE

Ten of 13 studies demonstrate significant neurological protection from CSF drainage ( $\pm$ additional adjuncts, two papers showed no significant difference between controls and one study was unable to provide any conclusions). In the studies that demonstrated no significant difference, CSF pressures were not infrequently  $> 15$  mmHg, and it does appear from the remaining studies that benefit is obtained through the maintenance of CSF pressures  $< 10$  mmHg. Unfortunately, many of these studies did also use an additional adjunct, which makes the analysis of the effects of CSF drainage alone harder.

Despite the observed complications (catheter occlusion or dislodgement, headache, meningitis and subdural haematoma being the most noted), CSF drainage (maintaining pressures  $< 10$  mmHg) in patients undergoing thoracic and/or thoracoabdominal aortic surgery is an effective neuroprotective adjunct.

**Conflict of interest:** none declared.

## REFERENCES

- [1] Dunning J, Prendergast B, Mackway-Jones K. Towards evidence-based medicine in cardiothoracic surgery: best BETS. *Interact CardioVasc Thorac Surg* 2003;2:405–9.
- [2] Cina CS, Abouzahr L, Arena GO, Lagana A, Devereaux PJ, Farrokhkar F. Cerebrospinal fluid drainage to prevent paraplegia during thoracic and thoracoabdominal aortic aneurysm surgery: a systemic review and meta-analysis. *J Vasc Surg* 2004;40:36–44.
- [3] Khan SN, Stansby G. Cerebrospinal fluid drainage for thoracic and thoracoabdominal aortic aneurysm surgery. *Cochrane Database Syst Rev* 2004. CD003635.
- [4] Crawford ES, Svensson LG, Hess KR, Shenaq SS, Coselli JS, Safi HJ *et al.* A prospective randomized study of cerebrospinal fluid drainage to prevent paraplegia after high-risk surgery on the thoracoabdominal aorta. *J Vasc Surg* 1991;13:36–45. discussion 45–6.
- [5] Svensson LG, Hess KR, D'Agostino RS, Entrup MH, Hreib K, Kimmel WA *et al.* Reduction of neurologic injury after high-risk thoracoabdominal aortic operation. *Ann Thorac Surg* 1998;66:132–8.
- [6] Coselli J, LeMaire S, Koksoy C, Schmittling Z, Curling P. Cerebrospinal fluid drainage reduces paraplegia after thoracoabdominal aortic aneurysm repair: results of a randomized clinical trial. *J Vasc Surg* 2002;35: 631–9.
- [7] Hollier LH, Money SR, Naslund TC, Proctor CD, Buhrman WC, Marino RJ *et al.* Risk of spinal cord dysfunction in patients undergoing thoracoabdominal aortic replacement. *Am J Surg* 1992;164:210–3.
- [8] Murray MJ, Bower TC, Oliver WC Jr, Werner E, Glocvicki P. Effects of cerebrospinal fluid drainage in patients undergoing thoracic and thoracoabdominal aortic surgery. *J Cardiothorac Vasc Anesth* 1993;7: 266–72.
- [9] Safi HJ, Winnerkvist A, Miller CC III, Iliopoulos DC, Reardon MJ, Espada R *et al.* Effect of extended cross-clamp time during thoracoabdominal aortic aneurysm repair. *Ann Thorac Surg* 1998;66:1204–9.
- [10] Safi HJ, Miller CC, Huynh TTT, Estrera AL, Porat EE, Winnerkvist AN *et al.* Distal aortic perfusion and cerebrospinal fluid drainage for thoracoabdominal and descending thoracic aortic repair: ten years of organ protection. *Ann Surg* 2003;238:372–81.
- [11] Estrera AL, Miller CC III, Chen EP, Meada R, Torres RH, Porat EE *et al.* Descending thoracic aortic aneurysm repair: 12-year experience using distal aortic perfusion and cerebrospinal fluid drainage. *Ann Thorac Surg* 2005;80:1290–6.
- [12] Acher CW, Wynn MM, Hoch JR, Kranner PW. Cardiac function is a risk factor for paralysis in thoracoabdominal aortic replacement. *J Vasc Surg* 1998;27:821–8.
- [13] Cheung AT, Weiss SJ, McGarvey ML, Stecker MM, Hogan MS, Escherich A *et al.* Interventions for reversing delayed-onset postoperative paraplegia after thoracic aortic reconstruction. *Ann Thorac Surg* 2002;74:413–9.
- [14] Hnath JC, Mehta M, Taggart JB, Sternbach Y, Roddy SP, Kreienberg PB *et al.* Strategies to improve spinal cord ischaemia in endovascular thoracic aortic repair: outcomes of a prospective cerebrospinal fluid drainage protocol. *J Vasc Surg* 2008;48:836–40.
- [15] Weaver KD, Wiseman DB, Farber M, Ewend MG, Marston W, Keagy BA. Complications of lumbar drainage after thoracoabdominal aortic aneurysm repair. *J Vasc Surg* 2001;34:623–7.
- [16] Cheung AT, Pochettino A, Guvakov DV, Weiss S, Shanmugan S, Bavaria J. Safety of lumbar drains in thoracic aortic operations performed with extracorporeal circulation. *Ann Thorac Surg* 2003;76:1190–7.
- [17] Wynn MM, Mell MW, Tefera G, Hoch JR, Acher CW. Complications of spinal fluid drainage in thoracoabdominal aortic aneurysm repair: a report of 486 patients treated from 1987 to 2008. *J Vasc Surg* 2009;49:34–5.
- [18] Leyvi G, Ramachandran S, Wasnick JD, Plestis K, Cheung AT, Drenger B. Case 3—2005 risk and benefits of cerebrospinal fluid drainage during thoracoabdominal aortic aneurysm surgery. *J Cardiothorac Vasc Anesth* 2005;19:392–9.
